# Supplementary material for: NPR1 Translocation from Chloroplast to Nucleus Activates Plant Tolerance to Salt Stress
Source: MDPI journal article supplement (doi:10.3390/antiox12051118), 2023-05-18
Supplement: s1 [file s1]

**Table S1. Sequences of primers for real-time qRT-PCR**

| Gene           | Strand             | Sequences                                         |
|----------------|--------------------|---------------------------------------------------|
| <i>β-Actin</i> | Forward<br>Reverse | TCACAGAAGCTCCTCCTAATCC<br>GGGAAAGAACAGCCTGAATG    |
| <i>Chl I</i>   | Forward<br>Reverse | AGCTCCAGAACCAAATCGAC<br>TCTTGCTGCCCTGTTAGTGA      |
| <i>GUN1</i>    | Forward<br>Reverse | TTCGCTGCTTGCTGTTTGTAG<br>AAAAGCAACATCTACCTGCCC    |
| <i>STN7</i>    | Forward<br>Reverse | GGGAGCTATTAGCATCTATGG<br>TTGTGTAGCCCGGAAGAATTG    |
| <i>PC1</i>     | Forward<br>Reverse | TTCAAGAACAATGCCGGGTTC<br>GCGCACAGTAGAAAAGTGTAAG   |
| <i>POR1</i>    | Forward<br>Reverse | TGTCCAATGGAGCAGTAAGG<br>CCAGGCCTAATCCTGAAGAG      |
| <i>SIG2</i>    | Forward<br>Reverse | AGTTGGAAAGACTTGAGCAG<br>CCATAGTTCAGACGCTTCCTT     |
| <i>SIG6</i>    | Forward<br>Reverse | TGTTCTGAGTCCAAAGGAGAG<br>TTTAGCCTGTATAGTGCACGG    |
| <i>NRIP1</i>   | Forward<br>Reverse | AAAAATCTCCCAGACCCAC<br>CTTGGATAACCTGTGGTTGG       |
| <i>WHY1</i>    | Forward<br>Reverse | GAGAGGGTTTTGTGCTGCTTC<br>CAACCCTCAACACCTTCCTGAC   |
| <i>PRIN2</i>   | Forward<br>Reverse | CTTGCAATGCCGAGTATGGTG<br>CATTGTCTACGTGAGTTTGAGCCC |
| <i>ABI4</i>    | Forward<br>Reverse | TTCACAGCAGTTGGTTCAGC<br>TCAAGTTTTGGCGGCTTCTG      |
| <i>ZAT10</i>   | Forward<br>Reverse | ACACAAAGCTAGTCACCGGAAG<br>TTACTGTTACCGCCGTCGTAG   |
| <i>EX1</i>     | Forward<br>Reverse | TGATGGCGAAGAATGGGGTTG<br>GCAATGCCACCTTGAGTTTAG    |
| <i>EX2</i>     | Forward<br>Reverse | TCAGGTTGGGATTGGAACCG<br>TTCAGCAACAGAGTCCTTCGC     |
| <i>SAL1</i>    | Forward<br>Reverse | CTTGCTGCTGCTAAGAAAGCTG<br>GTCCTCCTCAGCCACTAATG    |
| <i>GLK1</i>    | Forward<br>Reverse | AGAGATGAATCCGTGGCCTG<br>GTGAAGGATGAAGATGAGGAGG    |
| <i>GLK2</i>    | Forward<br>Reverse | TATAGCGGAGCCACCACAATC<br>AGGTGCTGCAATCTCGCTG      |
| <i>FC2</i>     | Forward<br>Reverse | CTCTCGGCTTCTTCAACCAATG<br>GACGATCCACCAAATACACTGC  |
| <i>CAI</i>     | Forward<br>Reverse | GCAGGAAGCTGTGAATGTATC<br>GAGAAAGACCGAAGTTGAGTC    |
| <i>RRTF</i>    | Forward<br>Reverse | CCTCTGTTTCGCGTTCCAAAAG<br>ATTTTCCCCACGGTCTCTGTC   |
| <i>NPR1</i>    | Forward<br>Reverse | GCTGTAGCATATTGCGATGC<br>GCAACATGCAGCACTGTGTA      |
| <i>GFP</i>     | Forward<br>Reverse | ACTACCTGTTCCATGGCCAA<br>AAGCTCGATCCTGTTGACGA      |
| <i>PR-1</i>    | Forward<br>Reverse | TTGAGATGTGGGTCGATGAG<br>CCTAGCACATCCAACACGAA      |
| <i>PR-2</i>    | Forward<br>Reverse | ACTGAGGCACAAGGAGCATA<br>CACGAATAGATGCACCACGG      |
| <i>PR-3</i>    | Forward<br>Reverse | AGGAACGACGGTAGATGTCC<br>TCCTACGGGCAGTATCATCA      |

|                |                    |                                                 |
|----------------|--------------------|-------------------------------------------------|
| <i>PR-4</i>    | Forward<br>Reverse | ATGGCTGGACTGCTTTCTGT<br>CTCACTGTTGCTTGAGTTCCTG  |
| <i>PR-5</i>    | Forward<br>Reverse | GTCGTAATCTCAGATGCACAGC<br>AGTAGGCCACATGATCCAG   |
| <i>TGA2</i>    | Forward<br>Reverse | ACAAGCAGAAGCCCATTG<br>TGGCCTTGAAGTCCAATTGG      |
| <i>ACS5</i>    | Forward<br>Reverse | CATCCACCTCGTATGTGACG<br>CCGACTCTGAATCCAGGAAA    |
| <i>Rbc S</i>   | Forward<br>Reverse | AGGTGTGGCCACCAATTAAC<br>GTCTCGAATTCCAAGCAAGG    |
| <i>CAB3</i>    | Forward<br>Reverse | ATTGGGTCTTGCTGAAGATCC<br>TTCCGGGAACAAAGTTTGTGG  |
| <i>CAB13</i>   | Forward<br>Reverse | GCAATGCTTGGAGCACTAGG<br>CTGAGCATGCACAAGTTAGG    |
| <i>CAB21</i>   | Forward<br>Reverse | GTCCATTCTCCGGTGAGTCC<br>CACATCCAAGAGCACCAAGC    |
| <i>CAB36</i>   | Forward<br>Reverse | CATTCGCTAGGAACCGTGAG<br>TATCTGAGATCCGGCCTTGA    |
| <i>PsaF</i>    | Forward<br>Reverse | CCATGCAAGGAGTCTAAGCA<br>GCAATCCATCTGATCCACAC    |
| <i>PsaK</i>    | Forward<br>Reverse | ATGAGGCGTAAAGGACAAGG<br>GCCTTCCTATTTGCTGATGG    |
| <i>PsaN</i>    | Forward<br>Reverse | TTGGTGCATCTGAACTCACC<br>GCTTGGTTCTTGTTGGCTTC    |
| <i>AtNPR1</i>  | Forward<br>Reverse | GAATCCGTCTTTGACTCGCC<br>GCGGTGTTGTTGGAGTCTTTC   |
| <i>AtABI4</i>  | Forward<br>Reverse | AGATCCGAGAGCCACGTAAG<br>AGGGAGGAGAGGTCTTAGGG    |
| <i>AtEX1</i>   | Forward<br>Reverse | GATGATGATTGGGATTGGGG<br>AATTGCCACCTTTAGCCTCG    |
| <i>AtEx2</i>   | Forward<br>Reverse | GTTGGAACCGTCACTTCTCC<br>TCAGCGACAGCATCATCAAC    |
| <i>AtSAL1</i>  | Forward<br>Reverse | CCGCGAAAAGATTTGGGACC<br>GCTATGGAGTCACGAACTGC    |
| <i>AtWHY</i>   | Forward<br>Reverse | GCTGAAGGATTGCCTGCTAG<br>TGTCGTACACCAGCAGAAGG    |
| <i>AtGLK1</i>  | Forward<br>Reverse | TTGGATTTGGTGGTGCTCGTC<br>AGCTCTGTCATAACACCGTC   |
| <i>AtGLK2</i>  | Forward<br>Reverse | GCCGTCTCGAATCTTGGA<br>ATGTCTCCGGAGATTCCAGC      |
| <i>AtPRIN2</i> | Forward<br>Reverse | TCTTGCGCAGTGAGTATGGA<br>GACACATCTGCTACCCCACT    |
| <i>AtZAT10</i> | Forward<br>Reverse | TCACACGTTTGCACCATCTG<br>TTCGTCTGCTCCGTTGACCAT   |
| <i>AtPsbA</i>  | Forward<br>Reverse | TATGGGTCGTGAGTGGGAAC<br>GAATGTTGTGCTCAGCCTGG    |
| <i>AtPsbB</i>  | Forward<br>Reverse | GATCCCGGTGCTTTACTTGC<br>ATATTCCAACCGCCCCAAGA    |
| <i>AtPsbJ</i>  | Forward<br>Reverse | CTGATACTACTGGAAGGATTCC<br>CTACAGGGATGAACCTAATCG |
| <i>AtPsbN</i>  | Forward<br>Reverse | GAAACAGCAACCCTAGTCGC<br>CTAGTCCCCGTGTTCTCTCG    |
| <i>AtRbcL</i>  | Forward<br>Reverse | AGGGAGTCAACTTTGGGCTT<br>AGGGTGGCCTAAAGTTCCTC    |
| <i>AtRbcS</i>  | Forward<br>Reverse | TTCGCAACACTAAGCCTACG<br>TCTCCCATACCTTCTGCGAG    |
